1 **Early B-cell transcription factor-2 defect as a novel cause of lipodystrophy: disruption of the**  
2 **adipose tissue character and integrity.**

3  
4 Maria C. Foss-Freitas<sup>1</sup>, Donatella Gilio<sup>1</sup>, Andre Monteiro da Rocha<sup>2</sup>, Lynn Pais<sup>3</sup>, Melanie C. O’Leary<sup>3</sup>, Heidi L.  
5 Rehm<sup>3,4</sup>, Adam Neidert<sup>1</sup>, Miriam S. Udler<sup>3,4,5</sup>, Patrick Seale<sup>6</sup>, Elif A. Oral<sup>1\*</sup>, Tae-Hwa Chun<sup>1,7\*</sup>

- 6  
7 1. Caswell Diabetes Institute and Metabolism, Endocrinology and Diabetes Division, Department of  
8 Internal Medicine, University of Michigan Medical School, Ann Arbor, Michigan, USA  
9 2. Frankel Cardiovascular Regeneration Core Laboratory, University of Michigan, Ann Arbor, Michigan.  
10 3. Program in Medical and Population Genetics, Broad Institute of MIT and Harvard, Cambridge, MA, USA  
11 4. Center for Genomic Medicine, Massachusetts General Hospital, Boston, MA, USA  
12 5. Diabetes Unit, Department of Medicine, Massachusetts General Hospital, Boston, MA, USA  
13 6. Institute for Diabetes, Obesity & Metabolism, Department of Cell and Developmental Biology, Perelman  
14 School of Medicine at the University of Pennsylvania, Philadelphia, USA.  
15 7. Biointerfaces Institute, The University of Michigan, Ann Arbor, Michigan, USA.

16  
17  
18 \*Co-corresponding authors and equal contribution  
19  
20  
21

## 1 **Summary**

2 We report a novel cause of partial lipodystrophy associated with early B cell factor 2 (*EBF2*) nonsense variant  
3 (*EBF2* 8:26033143 C>A, c.493G>T, p.E165X) in a patient with an atypical form of partial lipodystrophy. The  
4 patient presented with progressive adipose tissue loss and metabolic deterioration at pre-pubertal age. *In vitro*  
5 and *in vivo* disease modeling demonstrates that the *EBF2* variant impairs adipogenesis, causing excess  
6 accumulation of undifferentiated CD34<sup>+</sup> cells, extracellular matrix proteins, and inflammatory myeloid cells in  
7 subcutaneous adipose tissues. Thus, this *EBF2* p.E165X variant disrupts adipose tissue structure and  
8 function, leading to the development of partial lipodystrophy syndrome.

## 9 **Main Text**

11 The hallmark of lipodystrophy syndromes (LD) is loss of adipose tissue (AT) and resulting deficiency in  
12 function, leading to insulin resistance and metabolic syndrome<sup>1</sup>. These diseases can present as generalized or  
13 partial LD<sup>2</sup>. The genetic underpinnings of about 30% of generalized LD and about 50% of partial lipodystrophy  
14 (PLD) syndromes remain unsolved<sup>3</sup>. To better define the genetic causes of LD, we initiated genetic screenings  
15 of individuals affected by LD using whole-genome sequencing (WGS) and next-generation sequencing panels.  
16 With these efforts, we are encountering an increasing number of gene variants of unknown significance  
17 (VUS)<sup>4</sup>; however, defining the biological roles played by these VUS in the pathogenesis of LD remains crucial.  
18 Through these efforts, we identified a novel heterozygous nonsense variant of the early B-cell factor 2 (*EBF2*),  
19 encoding a helix-loop-helix transcription factor, in a patient with atypical PLD. Murine *Ebf2* plays a crucial role  
20 in mesenchymal tissue development, including adipocyte differentiation, brown fat development, and bone  
21 metabolism<sup>5-10</sup>. However, the role of *EBF2* in human AT development is unknown. A subset of white  
22 adipocytes of human visceral AT expresses *EBF2*<sup>11</sup>, and an *EBF2* single nucleotide polymorphism is  
23 associated with waist-hip ratio<sup>11,12</sup>, implicating the potential role of *EBF2* in regulating human AT function.  
24 Therefore, there was biological plausibility in investigating the impact of the newly identified nonsense *EBF2*  
25 variant to determine if it played a causal role in our patient's presentation. Here, we describe the functional  
26 impact of the observed *EBF2* nonsense variant on AT development and function through *in vitro* and *in vivo*  
27 disease modeling experiments.

1 **Methods** (Details and statistical methods are in the supplementary appendix.)

2 **Patient studies:** Our team has followed this patient since pre-pubertal age, and she has participated in  
3 research studies that allowed clinical phenotyping and tissue biopsies<sup>13,14</sup>. After informed consent was  
4 obtained, an experienced plastic surgeon obtained AT biopsies from the back of the neck, abdomen, and  
5 upper thigh regions of the patient.

6 **DNA sequencing:** WGS and data processing were performed using the Genomics Platform at the Broad  
7 Institute of MIT and Harvard.

8 **In vitro disease modeling:** 3T3-L1 mouse preadipocytes and primary human preadipocytes were used for *in*  
9 *vitro* disease modeling. Multiple siRNA oligos and lentiviral shRNA constructs targeting *Ebf2* were used for  
10 transient and permanent gene silencing. Wild-type and truncated variants of *EBF2* were expressed using  
11 bicistronic lentiviral constructs to assess the functional difference between the wild-type and the nonsense  
12 variant of *EBF2*. An *EBF2* reporter assay was performed to determine EBF2 transcriptional activity. Total RNA  
13 was extracted from cells and analyzed using targeted real-time qPCR and bulk RNA sequencing.

14 **In vivo disease modeling:** The University of Michigan Transgenic Mouse Core generated a knock-in mouse  
15 model by inserting the exact single nucleotide variant, *Ebf2* p.E165X, using Crispr-Cas technology. The mice  
16 were backcrossed into the C57BL/6J strain for five generations before analysis.

17

## 18 **Results**

### 19 **Case Report**

20 The patient's complex clinical presentation has been reported previously<sup>14 13</sup>. She is a young woman with PLD  
21 who first presented with progressive AT loss affecting hips and legs (Fig.1A,B). No lipodystrophy phenotype  
22 was observed in her relatives. One of her parent, diagnosed with atypical lupus, heart disease, and type 2  
23 diabetes, died prematurely at a young age; therefore, we do not have access to the genetic material. The  
24 patient also displayed scoliosis, hand contracture, and hypogonadotropic hypogonadism<sup>13</sup>. During follow-up,  
25 she developed progressive liver enzyme elevations and proteinuria and underwent liver and kidney biopsies.  
26 Her liver showed hepatocyte ballooning with excess lipid accumulation and fibrosis; her kidney showed fibrotic  
27 extracellular matrix (ECM) accumulation in the glomerulus and interstitial space (Supplement-Fig.1), which was

1 called "Alport-like pathology" by the case pathologist. A Clinical Laboratory Improvement Amendments (CLIA)  
2 certified lipodystrophy gene panel (*AGPAT2*, *AKT2*, *BSCL2*, *CAV1*, *CIDEA*, *LMNA*, *PLIN1*, *PPARG*, *PTRF*,  
3 *TBC1D4* and *ZMPSTE24*)<sup>13</sup> did not detect any known variants. Subsequently, we performed WGS on samples  
4 from the proband, mother, and two siblings. We identified a heterozygous nonsense gene variant of zinc-  
5 knuckle DNA-binding domain containing transcription factor, *EBF2*, which we confirmed with targeted Sanger  
6 sequencing (Fig.1C). The heterozygous nonsense variant of *EBF2* (NM\_022659.4) in exon 6, leads to the  
7 premature termination of *EBF2* at amino acid position 165 (*EBF2* 8:26033143 C>A, c.493G>T, p.E165X).  
8 Biopsies of subcutaneous adipose tissues at three different fat depots (neck, abdomen, hip) showed increased  
9 ECM accumulation and inflammation (Fig.1D), suggesting that disruption of tissue integrity may underlie this  
10 patient's metabolic dysfunction.

### 12 ***EBF2* p.E165X variant impairs adipocyte differentiation and function.**

13 We knocked down the endogenous *Ebf2* gene in 3T3-L1 preadipocytes using two siRNA oligonucleotides  
14 (Supplemental-Fig.2A-B). *Ebf2* silencing significantly impaired adipogenesis, as shown with reduced lipid  
15 accumulation and gene expression of adipocyte genes, *Pparg* and *Fabp4* (Supplemental-Fig.2C). To perform a  
16 rescue experiment to assess the adipogenic potential of *EBF2*, we used five different lentiviral shRNA  
17 constructs to permanently knockdown *Ebf2* expression in 3T3-L1 cells and selected a clone (clone-4) that  
18 showed the specific suppression of *Ebf2* relative to *Ebf1* (Supplemental-Fig.2D). When we reconstituted *Ebf2*-  
19 silenced 3T3-L1 cells with *EBF2* constructs using lentiviral gene transfer, full-length *EBF2* (*EBF2-full*) restored  
20 robust adipogenesis with enhanced expression of *Pparg* and *Fabp4* (Fig.2A-C); however, the restoration of  
21 adipogenesis was not observed with the nonsense *EBF2* variant (p.E165X, *EBF2-mut*). Adipogenic potential  
22 conferred by the lentiviral *EBF2* gene paralleled the transcriptional activity of *EBF2* as determined by reporter  
23 assays (Fig.2D). When unmodified 3T3-L1 cells (which maintain endogenous *Ebf2* expression) (Fig.2E) and  
24 human preadipocytes (which express *EBF2*) (Supplemental-Fig.3A) were transduced with the *EBF2-mut*, these  
25 cells displayed significantly impaired adipogenesis, as shown by decreased lipid droplet content and reduced  
26 expression of *PPARG* and *FABP4*. These results suggest a loss of function and a potentially dominant-  
27 negative effect exerted by the truncated *EBF2* nonsense variant (Fig.2F-H and Supplemental-Fig.3B-E). We

1 then performed bulk RNA sequencing of human preadipocytes, transduced with the lentivirus constructs of  
2 control, *EBF2-full*, and *EBF2-mut*, and stimulated with adipogenic cocktails (Fig.2I). The gene transfer of  
3 *EBF2-full* and *EBF2-mut* led to differential gene expression in the ECM and cytokine-cytokine receptor  
4 interactions pathways (Fig.2J-K). The *EBF2-mut* repressed the expression of *COL1A1*, *COL1A2*, *COL4A1*,  
5 *THBS1*, and *TNXB* while increasing the expression of *LAMB3*, *SPP1*, *LAMA1*, *ITGA10*, *ITGA5* (Fig.2J). The  
6 *EBF2-mut* also increased the expression several cytokines and growth factors, including *IL1A*, *IL1B*, *CXCL2*,  
7 *CCL5*, *IL24*, and *TGFB2* (Fig.2K). Together, these results reveal that the nonsense *EBF2* variant not only acts  
8 as a loss-of-function variant but partly exerts a dominant negative effect on adipogenesis and gene expression  
9 in the pathways of ECM remodeling and cytokine-cytokine receptor interaction. Consistent with these *in vitro*  
10 findings, the biopsied AT from our patient showed dysmorphic adipocytes surrounded by abundant ECM  
11 proteins and eosinophilic amorphous structures with excess myeloid cell infiltration (Fig.1D).

12  
13 ***Knock-in mouse model phenocopies pleiotropic effects of the nonsense EBF2 variant on tissue***  
14 ***structure and function.***

15 Based on these data, we hypothesize that the nonsense *EBF2* variant underlies the fibrotic and inflammatory  
16 AT damage observed in this patient. To test the hypothesis, we generated a knock-in mouse model (Fig.3A).  
17 While we had no difficulty obtaining heterozygous (HET) mice from HET to C57BL/6J mice breeding, we could  
18 rarely obtain homozygous (HM) knock-in mice, raising concerns about perinatal lethality. A surviving female  
19 HM mouse lacked perigonadal WAT and showed rudimentary subcutaneous and inguinal WAT with  
20 dysmorphic adipocytes and extensive accumulation of eosinophilic fibrillar structures (Fig.3B), which  
21 phenocopies the subcutaneous adipose tissues of the patient (HUM for human) displaying the limited number  
22 of adipocytes surrounded by excess ECM proteins (Fig.3C). HET mice similarly demonstrated fibrotic tissue  
23 alteration in subcutaneous AT (Fig.3B). Imaging cytometry (CyTOF) confirmed the deposition of type 1  
24 collagen and the increased number of CD34<sup>+</sup> cells and macrophages (F4/80<sup>+</sup> cells in mice and CD68<sup>+</sup> cells in  
25 the patient) (Fig.3D). CyTOF unveiled the infiltration of neutrophils (Ly6G<sup>+</sup> cells in mice and CD15<sup>+</sup> cells in  
26 humans) and monocytes (CD11b<sup>+</sup> cells in mice and CD11c<sup>+</sup> cells in humans) in HM and HUM tissues,  
27 respectively (Supplemental-Fig.4A). Immunostaining further validated these findings, showing the reduced

1 number of PLIN1<sup>+</sup> adipocytes and increased deposition of type 1 collagen, fibronectin, and elastin (Fig.3E)  
2 coupled with an increased number of smooth muscle cell actin (SMA)<sup>+</sup> cells, underscoring fibrotic phenotype of  
3 AT in the patient and KI mouse model (Supplemental-Fig.4B).

## 4 5 **Discussion**

6 In this report, we present a case of PLD caused by a nonsense variant of *EBF2* for the first time, adding  
7 a novel disease mechanism underlying a subtype of this condition. Although our case is a singleton, the *in vitro*  
8 and *in vivo* disease modeling provide evidence to establish the causality between the *EBF2* variant and the  
9 disease presentation. Our work also highlights the importance of deep tissue phenotyping in understanding the  
10 impact of observed variants in patients with PLD whose disease etiology remains elusive. In this case, the  
11 profound disruption in tissue architecture of the patient and striking resemblance of the knock-in model were  
12 crucial to drawing the causal link.

13 Our interest in this variant was spurred by the previous links of *EBF2* to adipogenesis, as highlighted in  
14 the introduction. Moreover, *EBF2* had emerged as a marker of a specific subset of visceral adipocytes in  
15 human AT single-cell studies<sup>11</sup>. The *in vivo* data was intriguing in demonstrating the profound impact of the  
16 variant in cultured cells, including human adipocytes, which supported the previous reports of knock-down  
17 experiments in 3T3-L1 cells<sup>5</sup>. However, our data also suggested a dominant negative effect of this variant  
18 inhibiting rescue conferred by full-length variant in cultured cells.

19 In addition to the phenotypic changes observed in cultured cells, the altered gene programs were in  
20 pathways that regulated ECM integrity and local inflammation. These findings supported the observations from  
21 the AT of our patient and the KI model in which we observed excess ECM accumulation and inflammatory  
22 myeloid cell infiltration in proximity to CD34<sup>+</sup> cells. CD34<sup>+</sup>CD31<sup>-</sup> mesenchymal stem cells differentiate into  
23 adipocytes during AT development and in obesity<sup>15,16</sup>. The increased number of CD34<sup>+</sup> cells juxtaposed with  
24 excess ECM accumulation suggests the critical role played by *EBF2* in regulating AT character and ECM  
25 homeostasis. *EBF2* is a crucial transcription factor determining the fate of aging fibroblasts and osteoblasts<sup>6,17</sup>.  
26 While we focused on adipogenesis *in vitro* and AT structure *in vivo*, the *EBF2* nonsense variant may exert  
27 tissue-specific fibrosis and inflammation in various tissues where *EBF2* is expressed. Indeed, previous studies

1 of *Ebf1* and *Ebf2* knockout mice showed impaired development of kidneys and bones, respectively<sup>18-20</sup>.

2 Our findings suggest that dysregulated ECM remodeling is coupled with aberrant cytokine expression,  
3 at least in the cultured cells, leading to activation of inflammation, which was observed in patient and KI model-  
4 derived tissues. We believe this progressive inflammation and dysregulated ECM remodeling may have played  
5 a major role in our patient's metabolic deterioration. Indeed, the patient showed chronic insulin resistance and  
6 metabolic dysfunction-associated steatohepatitis (MASH) and later developed autoimmune diabetes and  
7 hepatitis<sup>13,14</sup>, suggesting the pathological coupling of lipodystrophy syndrome with immune dysregulation.

8 Although groundbreaking as a new cause of lipodystrophy, our study is limited by the observation of  
9 this rare variant in a single patient and our focus mainly on AT. However, *EBF2* may have different important  
10 roles in other tissues, including bone formation and kidney podocyte differentiation<sup>5,6,17</sup>. *EBF* activity is also  
11 important for muscle development<sup>21,22</sup>. Our findings reveal more SMA+ cells and elastin in HM and HUM AT,  
12 indicating a need for further studies to clarify *EBF2*'s role in myofibroblast activity. Previously, disease links of  
13 *EBF2* to Kallmann syndrome and ventral hernia have been reported<sup>23,24</sup>. Our patient had clinical findings of  
14 scoliosis, hand contractures, hypogonadotropic hypogonadism, disruption of the abdominal wall and renal  
15 mesangial expansion, and ECM accumulation, as described previously. The spectrum of clinical findings may  
16 all be consistent with *EBF2* dysfunction, and future work is needed to define the precise pathophysiological  
17 abnormalities in other tissues.

18 In conclusion, our study identified a role for *EBF2* disruption in partial lipodystrophy for the first time.  
19 We propose that this variant leads to aborted adipogenesis, accumulation of CD34+ cells, aberrant ECM  
20 deposition, and increased inflammatory myeloid cells in the AT. Though only speculative at this stage, the  
21 alteration in *EBF2* may result in a novel pathophysiological mechanism that alters the integrity and function of  
22 other tissues.

23  
24 **Authors contributions:** MF-F conducted experiments, analyzed data, collected patient data, organized  
25 figures, and drafted the manuscript. DG performed experiments. AMR contributed to experiments and  
26 participated in result discussions. LP analyzed genome sequencing data. MO'L, HLR, and MSU offered variant  
27 interpretation guidance and reviewed manuscript drafts. AN contributed to patient data collection. PS

1 participated in result discussions and provided experimental guidance. **EAO** conceived the project, assembled  
2 the study team, formed all aspects of the collaborations, discussed and gathered data, designed, supervised  
3 and oversaw patient studies, provided clinical care to the patient, secured funding, critically reviewed data  
4 analyses, and contributed to manuscript writing. **THC** planned laboratory experiments, curated data, performed  
5 final analysis, and contributed to manuscript writing. All authors critically reviewed and approved the  
6 manuscript. EAO and THC jointly take responsibility for the integrity of the data.

7  
8 **Acknowledgments:** We are grateful to our patient and her mother for providing us with an important research  
9 question to pursue and for inspiring our translational pipeline. Clinical phenotyping was made possible by NIH  
10 grant [5R03DK074488](#) (Oral EA) and by Lipodystrophy Research Fund (Oral EA) established at the University  
11 of Michigan Medical School through philanthropic support (by Sopha Family, Baker family, Rosenblum family  
12 and White Point Foundation of Turkey). Infrastructure support has been enabled by NIH grants  
13 [2P30DK089503](#), [5P30DK020572](#), and [UL1TR002240](#), as well as support from Caswell Diabetes Institute of  
14 Michigan Medicine. Sequencing and analysis were provided by the Broad Institute of MIT and Harvard Center  
15 for Mendelian Genomics (Broad CMG) and were funded by the NIH grant [K23DK114551](#), National Human  
16 Genome Research Institute grants [UM1HG008900](#) (with additional support from the National Eye Institute, and  
17 the National Heart, Lung and Blood Institute) and [R01HG009141](#), and in part by Chan Zuckerberg Initiative  
18 grant [DAF2019-199278](#) (<https://doi.org/10.37921/236582yuakxy>), an advised fund of Silicon Valley Community  
19 Foundation (funder DOI [10.13039/100014989](#)). We thank The Vector Core of the University of Michigan  
20 (Thomas Lanigan and Roland Hilgart) for designing and preparing lentivirus constructs. We thank the  
21 Transgenic Animal Model Core of the University of Michigan (Thomas L. Saunders, Zachary T. Freeman,  
22 Elizabeth Hughes, Wanda Filipiak, Galina Gabrilina, and Honglai Zhang) for the design and production of the  
23 Ebf2 Glu165X transgenic mice.



## 1 REFERENCES

- 2 1. Brown RJ, Araujo-Vilar D, Cheung PT, et al. The Diagnosis and Management of Lipodystrophy Syndromes: A  
3 Multi-Society Practice Guideline. *J Clin Endocrinol Metab* 2016;101(12):4500-4511. (In eng). DOI:  
4 10.1210/jc.2016-2466.
- 5 2. Mosbah H, Akinci B, Araújo-Vilar D, et al. Proceedings of the annual meeting of the European Consortium of  
6 Lipodystrophies (ECLIP) Cambridge, UK, 7-8 April 2022. *Ann Endocrinol (Paris)* 2022;83(6):461-468. (In eng). DOI:  
7 10.1016/j.ando.2022.07.674.
- 8 3. Foss-Freitas MC, Akinci B, Luo Y, Stratton A, Oral EA. Diagnostic strategies and clinical management of  
9 lipodystrophy. *Expert Rev Endocrinol Metab* 2020;15(2):95-114. (In eng). DOI:  
10 10.1080/17446651.2020.1735360.
- 11 4. Eldin AJ, Akinci B, da Rocha AM, et al. Cardiac phenotype in familial partial lipodystrophy. *Clin Endocrinol (Oxf)*  
12 2021;94(6):1043-1053. (In eng). DOI: 10.1111/cen.14426.
- 13 5. Jimenez MA, Akerblad P, Sigvardsson M, Rosen ED. Critical role for Ebf1 and Ebf2 in the adipogenic  
14 transcriptional cascade. *Mol Cell Biol* 2007;27(2):743-57. (In eng). DOI: 10.1128/mcb.01557-06.
- 15 6. Kieslinger M, Folberth S, Dobрева G, et al. EBF2 regulates osteoblast-dependent differentiation of osteoclasts.  
16 *Dev Cell* 2005;9(6):757-67. (In eng). DOI: 10.1016/j.devcel.2005.10.009.
- 17 7. Rajakumari S, Wu J, Ishibashi J, et al. EBF2 determines and maintains brown adipocyte identity. *Cell Metab*  
18 2013;17(4):562-74. (In eng). DOI: 10.1016/j.cmet.2013.01.015.
- 19 8. Seale P. Transcriptional Regulatory Circuits Controlling Brown Fat Development and Activation. *Diabetes*  
20 2015;64(7):2369-75. (In eng). DOI: 10.2337/db15-0203.
- 21 9. Shao M, Zhang Q, Truong A, et al. ZFP423 controls EBF2 coactivator recruitment and PPAR $\gamma$  occupancy to  
22 determine the thermogenic plasticity of adipocytes. *Genes Dev* 2021;35(21-22):1461-1474. (In eng). DOI:  
23 10.1101/gad.348780.121.
- 24 10. Shapira SN, Lim HW, Rajakumari S, et al. EBF2 transcriptionally regulates brown adipogenesis via the histone  
25 reader DPF3 and the BAF chromatin remodeling complex. *Genes Dev* 2017;31(7):660-673. (In eng). DOI:  
26 10.1101/gad.294405.116.
- 27 11. Emont MP, Jacobs C, Essene AL, et al. A single-cell atlas of human and mouse white adipose tissue. *Nature*  
28 2022;603(7903):926-933. (In eng). DOI: 10.1038/s41586-022-04518-2.
- 29 12. Agrawal S, Wang M, Klarqvist MDR, et al. Inherited basis of visceral, abdominal subcutaneous and gluteofemoral  
30 fat depots. *Nature Communications* 2022;13(1). DOI: 10.1038/s41467-022-30931-2.
- 31 13. Akinci B, Meral R, Rus D, et al. The complicated clinical course in a case of atypical lipodystrophy after  
32 development of neutralizing antibody to metreleptin: treatment with setmelanotide. *Endocrinol Diabetes Metab*  
33 *Case Rep* 2020;2020 (In eng). DOI: 10.1530/EDM-19-0139.
- 34 14. Altarejos JY, Pangilinan J, Podgrabska S, et al. Preclinical, randomized phase 1, and compassionate use  
35 evaluation of REGN4461, a leptin receptor agonist antibody for leptin deficiency. *Sci Transl Med*  
36 2023;15(723):eadd4897. (In eng). DOI: 10.1126/scitranslmed.add4897.
- 37 15. Lin CS, Xin ZC, Deng CH, Ning H, Lin G, Lue TF. Defining adipose tissue-derived stem cells in tissue and in culture.  
38 *Histol Histopathol* 2010;25(6):807-15. (In eng). DOI: 10.14670/HH-25.807.
- 39 16. Ravaud C, Esteve D, Villageois P, Bouloumie A, Dani C, Ladoux A. IER3 Promotes Expansion of Adipose Progenitor  
40 Cells in Response to Changes in Distinct Microenvironmental Effectors. *Stem Cells* 2015;33(8):2564-73. (In eng).  
41 DOI: 10.1002/stem.2016.
- 42 17. Nieminen-Pihala V, Rummukainen P, Wang F, Tarkkonen K, Ivaska KK, Kiviranta R. Age-Progressive and Gender-  
43 Dependent Bone Phenotype in Mice Lacking Both Ebf1 and Ebf2 in Prrx1-Expressing Mesenchymal Cells. *Calcif*  
44 *Tissue Int* 2022;110(6):746-758. (In eng). DOI: 10.1007/s00223-022-00951-7.
- 45 18. Fretz JA, Nelson T, Velazquez H, Xi Y, Moeckel GW, Horowitz MC. Early B-cell factor 1 is an essential transcription  
46 factor for postnatal glomerular maturation. *Kidney Int* 2014;85(5):1091-102. (In eng). DOI: 10.1038/ki.2013.433.
- 47 19. Nelson T, Velazquez H, Troiano N, Fretz JA. Early B Cell Factor 1 (EBF1) Regulates Glomerular Development by  
48 Controlling Mesangial Maturation and Consequently COX-2 Expression. *J Am Soc Nephrol* 2019;30(9):1559-1572.  
49 (In eng). DOI: 10.1681/ASN.2018070699.
- 50 20. Fretz JA, Nelson T, Xi Y, Adams DJ, Rosen CJ, Horowitz MC. Altered metabolism and lipodystrophy in the early B-

1 cell factor 1-deficient mouse. *Endocrinology* 2010;151(4):1611-21. (In eng). DOI: 10.1210/en.2009-0987.

2 21. Green YS, Vetter ML. EBF proteins participate in transcriptional regulation of *Xenopus* muscle development. *Dev*  
3 *Biol* 2011;358(1):240-50. (In eng). DOI: 10.1016/j.ydbio.2011.07.034.

4 22. Jin S, Kim J, Willert T, et al. Ebf factors and MyoD cooperate to regulate muscle relaxation via Atp2a1. *Nat*  
5 *Commun* 2014;5:3793. (In eng). DOI: 10.1038/ncomms4793.

6 23. Jorgenson E, Makki N, Shen L, et al. A genome-wide association study identifies four novel susceptibility loci  
7 underlying inguinal hernia. *Nat Commun* 2015;6:10130. (In eng). DOI: 10.1038/ncomms10130.

8 24. Trarbach EB, Baptista MT, Garmes HM, Hackel C. Molecular analysis of KAL-1, GnRH-R, NELF and EBF2 genes in a  
9 series of Kallmann syndrome and normosmic hypogonadotropic hypogonadism patients. *J Endocrinol*  
10 2005;187(3):361-8. (In eng). DOI: 10.1677/joe.1.06103.

11

12

1 **Figure legends**

2 **Figure 1: Progressive partial loss of AT in a patient with atypical partial lipodystrophy.** A) Patient picture  
3 showing body fat distribution in front (far left) and side (second from left) panels, increased dorsal neck fat pad  
4 and acanthosis nigricans (arrow) (second from the right, upper), prominent superficial veins (arrows) due to fat  
5 loss in the legs (second from the right, lower). B) “Fat shadow” was obtained from the DEXA scan showing  
6 truncal AT distribution. C) Sanger sequence demonstrates the G>T nucleotide change in proband and  
7 reference sequence in non-affected mother. D) Hematoxylin-eosin (HE) and Masson Trichrome (MT) staining  
8 of subcutaneous AT (SQ) of the patient from different AT depots (abdomen, neck and thigh), showing AT  
9 surrounded by excess collagen deposition.

10  
11 **Fig. 2. In vitro studies to determine the effect of *EBF2* nonsense variant in adipogenesis.** A) Ebf2-  
12 silenced 3T3-L1 cells transduced with bicistronic empty GFP, EBF2-full GFP, and EBF2-mut GFP and  
13 adipogenesis induced. Lipid stained with BODIPY (red), nuclei (DAPI, blue), and GFP (green) (n=3). A  
14 representative figure is shown. Repeated more than four times. B) Fabp4 expression, and C) Pparg expression  
15 RT-qPCR (Diff= adipogenesis induced, data represents Mean±SEM, n=3, \*p=0.02, statistical test performed by  
16 One way ANOVA with Bonferroni’s multiple comparisons). D) E-box reporter assay. HEK cells transfected EBF  
17 luc reporter (data represents Mean±SEM, n=5, \*\*\*p<0.001, representative data, statistical test performed by  
18 One way ANOVA with Tukey’s multiple comparisons). E) Mouse 3T3-L1 preadipocytes transduced with  
19 lentivirus control, EBF2-full, and EBF2-mut. Adipogenesis was induced and lipid droplet accumulation was  
20 assessed (BODIPY= red, nucleus= blue) and GFP (green). A representative figure is shown. Repeated more  
21 than four times. Adipocytes were quantified using Image J software with ADIPOQ plug-in. Cells transduced  
22 with lentiviral EBF2-mut show less adipogenic index (data represents Mean±SEM, n=3, \*p=0.01, statistical test  
23 performed by One way ANOVA with Tukey’s multiple comparisons). G) *Pparg* and (H) *FABP4* gene expression  
24 from mouse 3T3-L1 preadipocytes transduced with lentivirus control, EBF2-full, and EBF2-mut (Diff=  
25 adipogenesis induced, data represents Mean±SEM, n=4, \*p=0.03, \*\*p=0.01, statistical test performed by One  
26 way ANOVA with Tukey’s multiple comparisons). I) Venn diagram of bulk RNA-seq of human SQ  
27 preadipocytes differentiated after lentiviral transduction of *EBF2-full*, *control*, and *EBF2-mut*. A cohort of ECM

1 genes (left) (J) and cytokine-cytokine receptor genes (right) (K) are differentially regulated by EBF2 compared  
2 to the control.

3  
4 **Fig. 3. Inguinal WAT (IWAT) phenotype of *Ebf2mut* knock-in (KI) mice is similar to AT obtained from our**  
5 **patient.** A) Knock-in of variant Glu165X in exon 7 with sgRNA and Cas9 ribonucleoprotein. B) Staining of white  
6 AT for Hematoxylin and eosin (HE), Masson Trichrome (MT) of IWAT of wild type (WT), heterozygous (HET),  
7 and homozygous (HM) *Ebf2mut*-KI animals and back of the neck WAT depot of our patient (HUM, for human)  
8 (Scale=100 $\mu$ m). C) Number of adipocytes measured from the HE images (n=10 random images per group),  
9 and percentage of fibrosis measured from MT images (n=10 random images per group) (\*\*p=0.01, \*\*\*p=0.001,  
10 \*\*\*\*p<0.001, data represents Mean $\pm$ SEM, statistical test performed by One way ANOVA with Tukey's multiple  
11 comparisons). D) Imaging Cytometry (CyTOF) obtained from IWAT samples from wild type (WT),  
12 heterozygous (HET), and homozygous (HM) *Ebf2mut*-KI animals, and back of the neck depot of our patient  
13 (HUM, for human) samples (Scale=100 $\mu$ m), upper panels show DNA staining (Blue), lower panels show  
14 merged image of Collagen-1 (lime), CD34 (red) and F4-80 or mice samples or CD68 for human sample  
15 (white). Immunofluorescence staining for Perilipin, Collagen-1, Elastin, CD34 and CD68 in IWAT of wild type  
16 (WT), heterozygous (HET), and homozygous (HM) *Ebf2mut*-KI animals, and human proband (HUM) samples  
17 (Scale=100 $\mu$ m).

A)

Contact the corresponding author to request access

B)

D)

### Subcutaneous Adipose Tissues

Abdomen

Neck

Thigh

HE

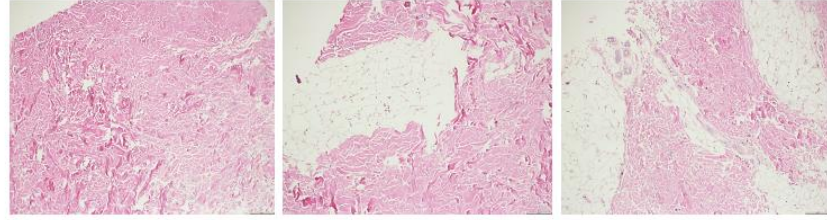

MT

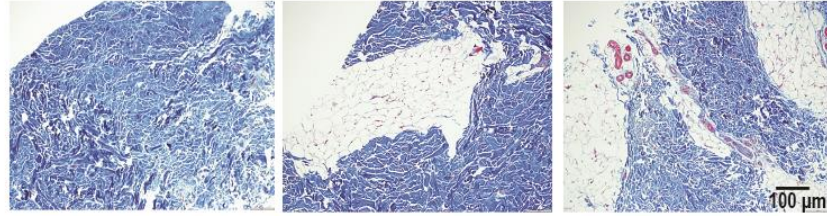

C)

**Nonsense variant on EBF2  
(NP\_073150.2:c.493G>T (p.Glu165\*))**

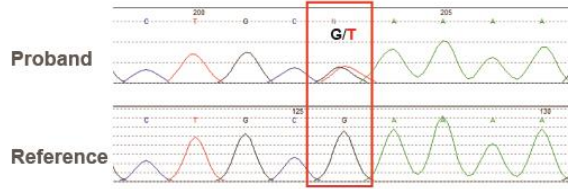

2 **Figure 1.**

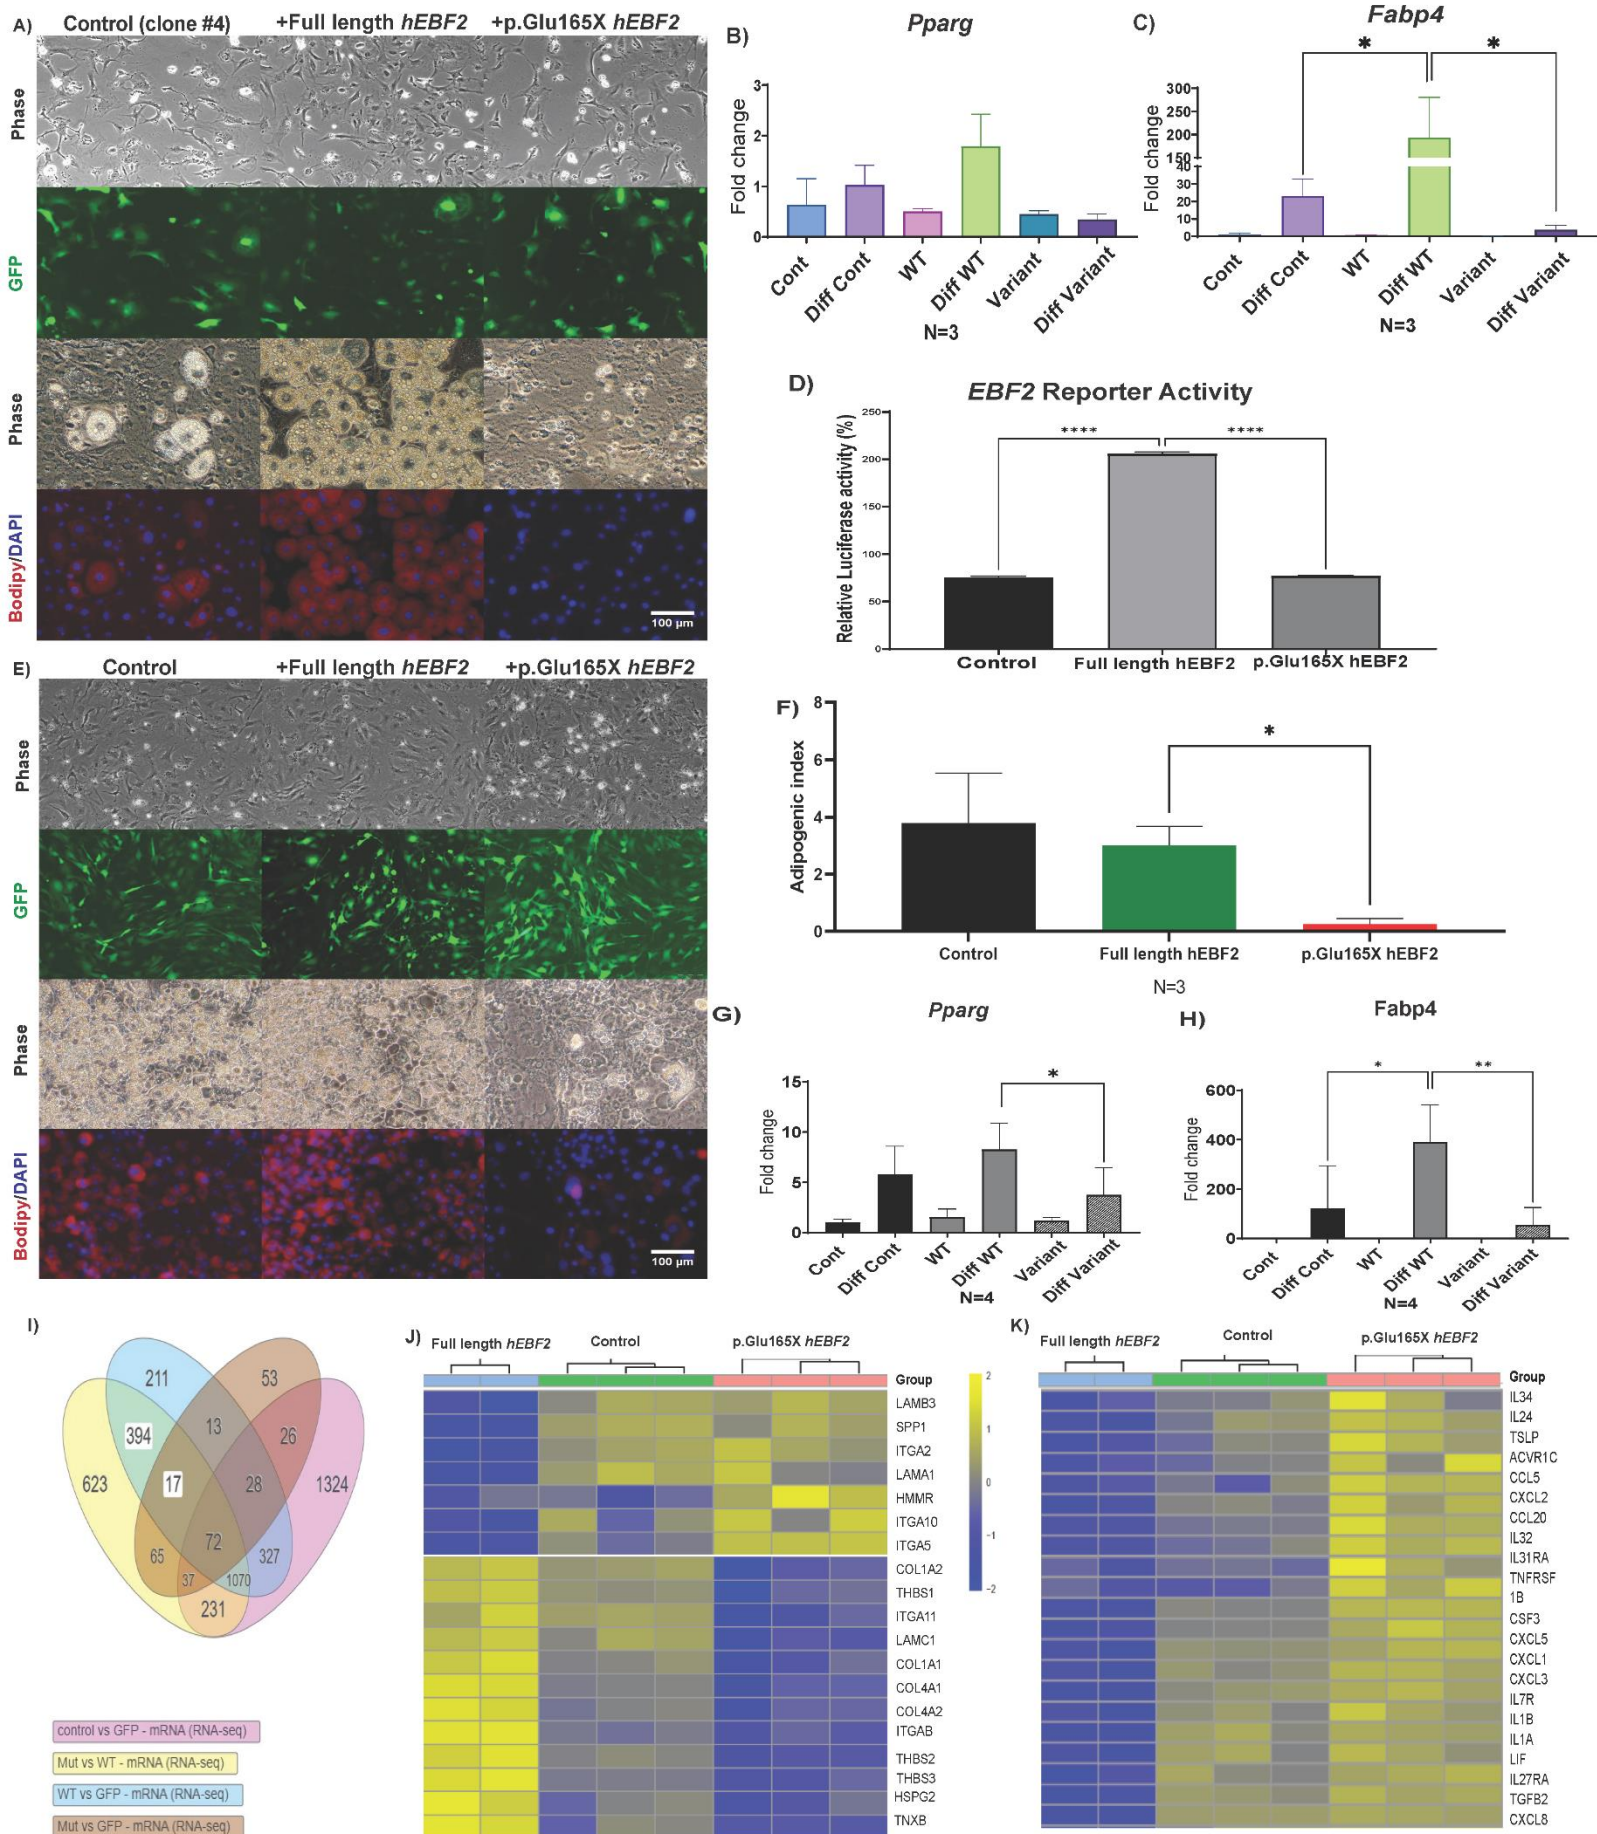

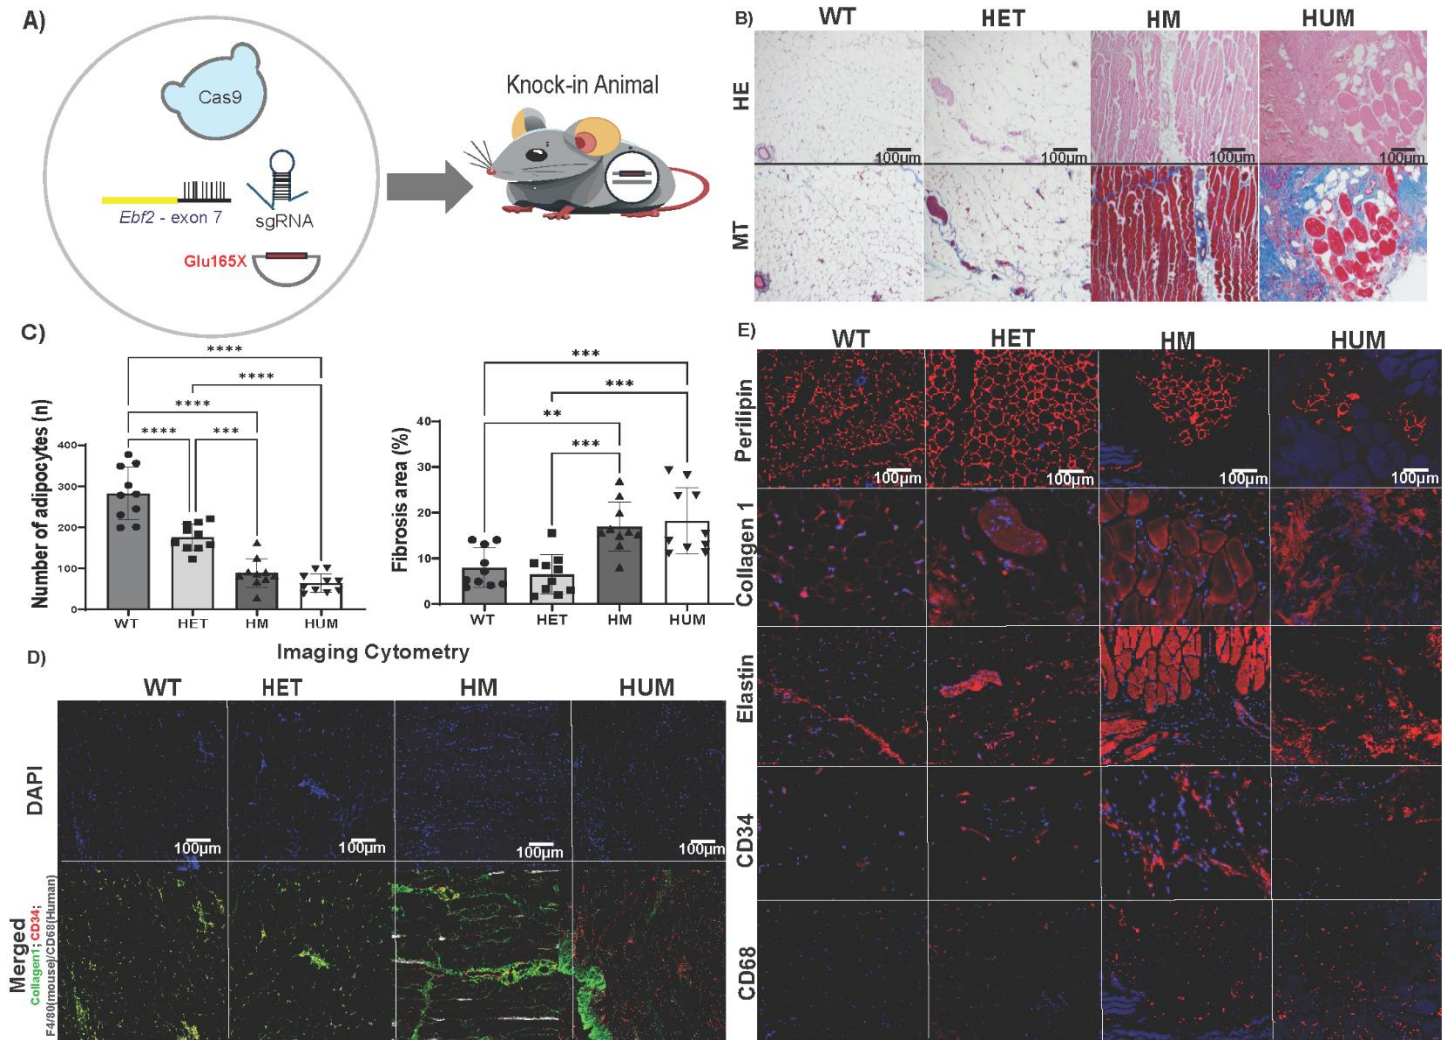

1

2 **Figure 3.**
